# Supplementary material
Source: publisher site journal article supplement (https://www.dovepress.com/article/560753)
Supplement: Supplementary file 1 [file Supplementary_Material_Cover.pdf › Supplementary_Material_Cover.pdf]

## Supplementary Material

**Title:** Supplementary Dataset S1: Raw Clinical Data for the Manuscript "The Predictive Value of Initial Trough Concentration of Voriconazole and Procalcitonin in Hepatotoxic Adverse Events"

**Description:** This archive contains the original clinical data as a Microsoft Excel Workbook (.xlsx).

**Sheet "Raw Clinical Data":** Clinical records of 170 patients receiving voriconazole treatment, including demographic information, laboratory values (voriconazole trough concentrations and procalcitonin levels), and the incidence of hepatotoxic adverse events.

**Corresponding Author:** Hongchao Zhu

**Email:** zhuhongchao366@126.com

**Manuscript ID:** 560753
